# Supplementary material
Source: Springer Nature journal article supplement (https://www.springermedizin.de/resource/supplementary/12913_2013_3115_MOESM1_ESM.pdf/9532428)
Supplement: MOESM1 [file 9532428]

## Independent variables

## Dependent variable

### Demographic and socio-economic characteristics

- Sex, age
- Household size
- Nb parents /household
- Level of education of the household head
- Occupation of the household head
- Asset ownership of the household

### Characteristics of the disease

- Type
- Perception (acute or chronic)
- Duration

### Health service characteristic

Cost of care

### Choice of care

#### Informal care

- Traditional medicine
- Selfmedication

#### Formal care

- Health professional
- First line health service
- Hospital
